# Supplementary material
Source: PubMed Central journal article supplement (PMC4288873)
Supplement: IAI.02197-14_zii001151023so3.pdf [file IAI.02197-14_zii001151023so3.pdf]

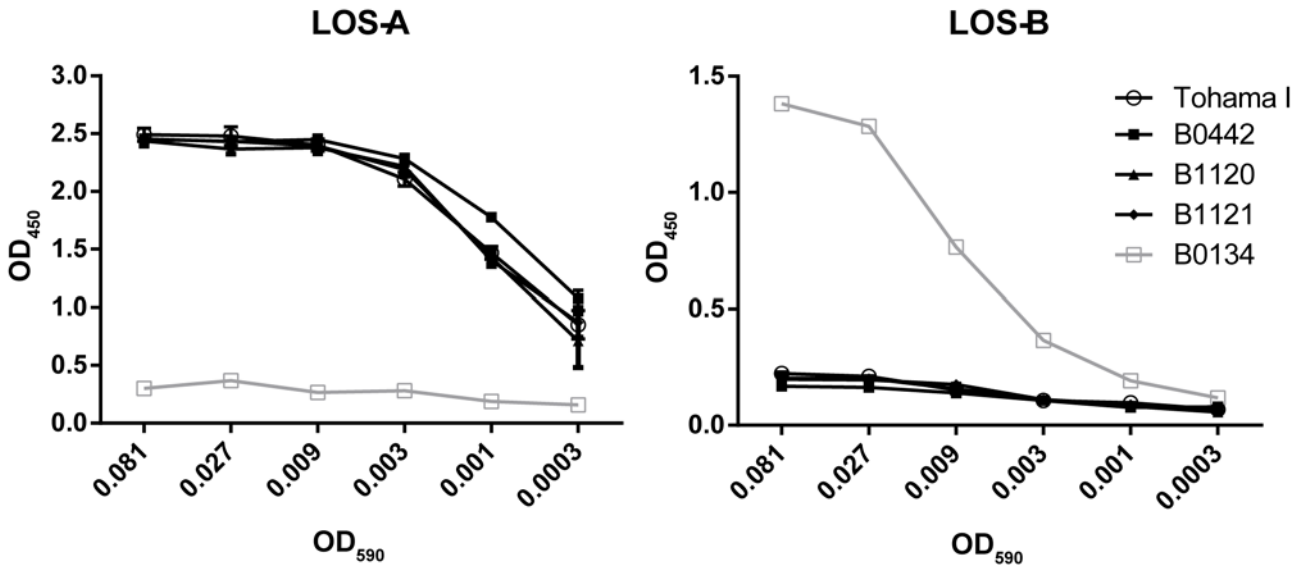

**Figure S3. Production of band A- and band B-LOS by the *B. pertussis* isolates.** The LOS-A (left panel) and LOS-B (right panel) production was measured in an ELISA, where the 96-well plate was coated with heat inactivated *B. pertussis* strains (OD, 0.081 to  $3 \times 10^{-4}$ ; 3-fold dilutions). Strain B0134 was used as a control, since it only produces LOS-B [64]. Data shown are representative results of one out of three independent.
